# Supplementary material
Source: PubMed Central journal article supplement (PMC4187816)
Supplement: IAI.02168-14_zii999090838so1.pdf [file IAI.02168-14_zii999090838so1.pdf]

**Table S1**

| <b>Strains and Plasmids</b> |                                                                                                                                                                                    |                            |
|-----------------------------|------------------------------------------------------------------------------------------------------------------------------------------------------------------------------------|----------------------------|
| <b>Strain Designation</b>   | <b>Description</b>                                                                                                                                                                 | <b>Reference or Source</b> |
| 1457                        | <i>S. epidermidis</i> clinical isolate                                                                                                                                             | P. Fey, (1)                |
| 7291                        | <i>S. epidermidis</i> clinical isolate                                                                                                                                             | P. Fey                     |
| RP62A                       | <i>S. epidermidis</i> clinical isolate                                                                                                                                             | ATCC 35984                 |
| 1457-FL                     | 1457 (pHL007); fluorescent reporter strain                                                                                                                                         | This study                 |
| 1457 $\Delta phnD$          | 1457 <i>phnD::dhfr</i> ; <i>phnD</i> deletion strain                                                                                                                               | This study                 |
| RN4220                      | <i>S. aureus</i> ; restriction-deficient cloning intermediate                                                                                                                      | P. Fey, (2)                |
| Lowenstein                  | <i>S. aureus</i> clinical isolate; capsular type 5                                                                                                                                 | ATCC 49521                 |
| MRSA252                     | <i>S. aureus</i> clinical isolate; methicillin resistant                                                                                                                           | ATCC BAA-1720              |
| SM131                       | <i>S. haemolyticus</i> clinical isolate                                                                                                                                            | ATCC 29970                 |
| R22                         | <i>S. hominis</i> clinical isolate                                                                                                                                                 | ATCC 700236                |
| <i>E. coli</i> TOP10        | cloning strain                                                                                                                                                                     | Invitrogen                 |
| <i>E. coli</i> BL21(DE3)    | protein expression strain; lambda lysogen encoding T7 RNA polymerase under control of the lacUV5 promoter                                                                          | Invitrogen                 |
| <b>Plasmid</b>              | <b>Description</b>                                                                                                                                                                 | <b>Reference or Source</b> |
| pUC19                       | general cloning vector; AmpR                                                                                                                                                       | New England Biolabs        |
| pE194                       | staphylococcal plasmid conferring ErmR                                                                                                                                             | P. Fey, (3)                |
| pROJ6448                    | pE194 with pC221 nick site for mobilization, temperature-sensitive replicon; ErmR                                                                                                  | P. Fey, (4)                |
| pHL007                      | <i>PftsA</i> -RFP (codon-optimized red fluorescent protein behind the <i>ftsA</i> promoter) ligated into multiple cloning site of pUC19, then combined with pE194 via <i>Pst</i> I | This study                 |
| pHL008                      | pROJ6448-derivative; allele exchange vector with <i>phnD::dhfr</i>                                                                                                                 | This study                 |

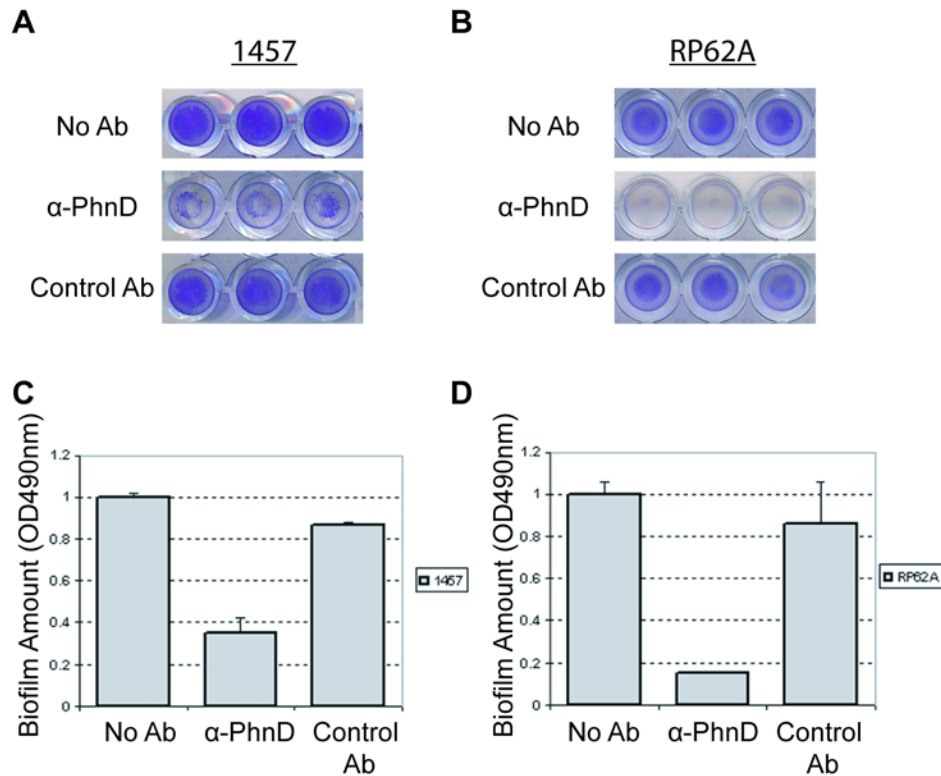

**Fig. S1**

## FIGURE LEGENDS FOR SUPPLEMENTAL MATERIAL

**Figure S1.** PhnD antibodies inhibit *S. epidermidis* biofilm formation in the standard microtiter plate assay. Biofilms of *S. epidermidis* strains 1457 and RP62A were seeded at an OD<sub>600nm</sub> of 0.05 and grown in TSB at 37°C. Cultures were incubated in triplicate with or without antibodies at 100  $\mu$ g/mL. After 8 h of static growth, biofilms were washed and stained with crystal violet. (A, B) Pictures of stained wells for each treatment. (C, D) Quantification of staining in panels A and B by absorbance spectroscopy, normalized to the ‘no antibody’ control as 1.0.

**Movie 1.** PhnD antibodies inhibit *S. epidermidis* 1457 biofilm formation. Time lapse video microscopy of biofilms grown at 37<sup>0</sup>C in the presence of control (rabbit anti-rat IgG, left) or PhnD (right) antibodies at 200 µg/mL. Images were acquired at 20 min intervals for 10 h. Scale bar: 30 µm.

**Movie 2.** PhnD antibodies inhibit *S. epidermidis* 1457-FL biofilm formation when administered in prophylactic mode. Time lapse video microscopy of biofilms grown at 30<sup>0</sup>C in the presence of control (rabbit anti-rat IgG, left) or PhnD (right) antibodies at 100 µg/mL. Images were acquired at 20 min intervals for 18 h. Scale bar: 30 µm.

**Movie 3.** PhnD antibodies inhibit *S. epidermidis* 1457-FL biofilm formation when administered in early therapeutic mode. Time lapse video microscopy of biofilms grown at 30<sup>0</sup>C in the presence control (rabbit anti-rat IgG, left) or PhnD (right) antibodies at 100 µg/mL. Images were acquired at 20 min intervals for 17 h. Scale bar: 30 µm.

**Movie 4.** Deletion of *phnD* results in defective biofilm formation. Time lapse video microscopy of *S. epidermidis* 1457 (left) and 1457  $\Delta$ *phnD* (right) strains grown at 30<sup>0</sup>C. Images were acquired at 20 min intervals for 18 h. Scale bar: 30 µm.

**Movie 5.** PhnD antibodies enhance the opsonophagocytosis of *S. epidermidis* biofilms. Neutrophils exhibit increased binding and active engulfment of biofilms in the presence of 5 µg/mL PhnD (right) versus control antibody (rabbit anti-rat IgG, left). Images were acquired at 2 min intervals for 4.25 h. Scale bar: 15 µm.

**Movie 6.** Single neutrophil tracking of biofilm opsonophagocytosis. A single neutrophil is capable of moving toward and engulfing large numbers of biofilm bacteria. Images were acquired at 2 min intervals for 108 min. Scale bar: 5  $\mu$ m.

**Movie 7.** PhnD antibodies inhibit *S. epidermidis* 1457-FL biofilms grown in human plasma. Longitudinal development of biofilms grown at 37<sup>0</sup>C in the presence of rabbit anti-rat IgG control (left) or PhnD antibodies (right) at 200  $\mu$ g/mL. Antibodies were administered in prophylactic mode at 200  $\mu$ g/mL. Images were acquired at 20 min intervals for 12 h. Scale bar: 30  $\mu$ m

## REFERENCES FOR SUPPLEMENTAL MATERIAL

1. **Mack D, Siemssen N, Laufs R.** 1992. Parallel induction by glucose of adherence and a polysaccharide antigen specific for plastic-adherent *Staphylococcus epidermidis*: evidence for functional relation to intercellular adhesion. *Infection and immunity* **60**:2048-2057.
2. **Kreiswirth BN, Lofdahl S, Betley MJ, O'Reilly M, Schlievert PM, Bergdoll MS, Novick RP.** 1983. The toxic shock syndrome exotoxin structural gene is not detectably transmitted by a prophage. *Nature* **305**:709-712.
3. **Horinouchi S, Weisblum B.** 1982. Nucleotide sequence and functional map of pE194, a plasmid that specifies inducible resistance to macrolide, lincosamide, and streptogramin type B antibiotics. *J Bacteriol* **150**:804-814.
4. **Projan SJ, Archer GL.** 1989. Mobilization of the relaxable *Staphylococcus aureus* plasmid pC221 by the conjugative plasmid pGO1 involves three pC221 loci. *J Bacteriol* **171**:1841-1845.
